# Supplementary material for: New Functions of Intracellular LOXL2: Modulation of RNA-Binding Proteins
Source: MDPI journal article supplement (doi:10.3390/molecules28114433), 2023-05-30
Supplement: s1 [file s1]

## **Supplementary materials**

### **Supplementary Datasets.**

**Dataset S1.** Data of LC-MS/MS of immunoprecipitation 1 and 2.

**Dataset S2.** RNA sequence analysis of the gene expression profile of shLOXL2 silenced cells versus shSCR control cells.

**Dataset S3.** List of bibliographic references with experimental evidences of involvement in EMT of the EMT-related gene signature.

### **Supplementary figure legends.**

**Figure S1.** Silencing of LOXL2 in Hs578T and MDA-MB-231 cell lines. LOXL2 silencing using shRNAs (shLOXL2) and a scramble control (shSCR) sequence was confirmed by qPCR (left panel) and WB (right panel).

**Figure S2.** Distribution of RBP targets among EMT-related DEGs. Red or grey squares denoted the presence or absence of RBPs binding sites respectively

**Figure S3.** Distribution of RBP targets among no EMT-related DEGs. Red or grey squares denoted the presence or absence of RBPs binding sites respectively.

### **Supplementary table.**

**Table S1.** Number of genes targeted by the selected RBPs in EMT- and no EMT-related signatures.

**Table S2.** List of primers used for qPCR analyses.

**Table S1**

Table S1. Distribution of genes targeted by the indicated RBP in EMT-related and no EMT-related signatures. The p-value was obtained by analysing the enrichment of RBPs hits between both categories using the Fisher's exact test.

| <b>RBP</b>     | <b>EMT-related</b> | <b>no EMT-related</b> | <b>p-value</b> |
|----------------|--------------------|-----------------------|----------------|
| <b>CSTF2T</b>  | 16                 | 46                    | 0.1775         |
| <b>DDX3X</b>   | 0                  | 0                     | na             |
| <b>DDX54</b>   | 24                 | 71                    | 0.1213         |
| <b>DGCR8</b>   | 18                 | 72                    | 0.8854         |
| <b>DHX9</b>    | 47                 | 176                   | 0.4586         |
| <b>ELAVL1</b>  | 42                 | 77                    | 4.1E-06        |
| <b>FMR1</b>    | 75                 | 258                   | 0.0327         |
| <b>FUS</b>     | 12                 | 40                    | 0.4659         |
| <b>HNRNPA1</b> | 85                 | 180                   | 0.137          |
| <b>HNRNPC</b>  | 30                 | 99                    | 0.212          |
| <b>HNRNPK</b>  | 8                  | 26                    | 0.5064         |
| <b>IGF2BP1</b> | 21                 | 53                    | 0.0419         |
| <b>IGF2BP2</b> | 31                 | 104                   | 0.2673         |
| <b>IGF2BP3</b> | 18                 | 52                    | 0.1514         |
| <b>LIN28B</b>  | 13                 | 35                    | 0.1817         |
| <b>METTL3</b>  | 0                  | 0                     | na             |
| <b>MOV10</b>   | 15                 | 37                    | 1.000          |
| <b>RBFOX</b>   | 39                 | 134                   | 0.2143         |
| <b>SRSF1</b>   | 32                 | 95                    | 0.0175         |
| <b>TAF15</b>   | 68                 | 224                   | 0.0248         |
| <b>TARDBP</b>  | 30                 | 127                   | 1.000          |
| <b>U2AF2</b>   | 59                 | 192                   | 0.0381         |
| <b>WTAP</b>    | 0                  | 0                     | na             |
| <b>YTHDC1</b>  | 3                  | 8                     | 0.4528         |

**Table S2**

Table S2: list of primers used for qPCR analysis.

| Gene                 | Forward primer (5'→3')  | Reverse primer (5'→3') |
|----------------------|-------------------------|------------------------|
| <b><i>AKR1C2</i></b> | CAGAGGTTCTCTAAAAGTAAAGC | TGTGCAGAATCAATATGGTG   |
| <b><i>CCL2</i></b>   | AGACTAACCCAGAAACATCC    | ATTGATTGCATCCTGGCTG    |
| <b><i>CLDN1</i></b>  | TTGGCATGAAGTGTATGAAG    | ACCTGCAAGAAGAAATATCG   |
| <b><i>CXCL3</i></b>  | CCTCAAGAACATCCAAAGTG    | CCCCTTGTTTCAGTATCTTTTC |
| <b><i>DUSP6</i></b>  | TTCTACCTGGAAGATGAAGC    | CAATGTCATGGCATCGTTC    |
| <b><i>ENPP2</i></b>  | ATAAAACAGTACGTGGAAGG    | CTACCCATTTTGATTGCGTC   |
| <b><i>GAPDH</i></b>  | CTTCACCACCATGGAGGAGGC   | GGCATGGACTGTGGTCATGAG  |
| <b><i>HEY2</i></b>   | GGATTATAGAGAAAGGCGTC    | GTTTTTCAAAGCAGTTGGC    |
| <b><i>ID1</i></b>    | ACTAAGTCACCAGAGACTTTAG  | AAATCTGAGAAGCACCAAAC   |
| <b><i>SLC2A3</i></b> | GGATAACTATAATGGGATGAGC  | CCACAATAAACCAGGGAATG   |
| <b><i>SOD2</i></b>   | ATCATACCCTAATGATCCCAG   | AGGACCTTATAGGGTTTTTCAG |
| <b><i>TULP3</i></b>  | AGGTCCTAGGAAAATGTCTG    | AAGTTGAGGACATAGGACTG   |
